# Supplementary material
Source: PubMed Central journal article supplement (PMC6801070)
Supplement: NIHMS1535140-supplement-4.pdf [file NIHMS1535140-supplement-4.pdf]

# INDIVIDUAL CONFLICT OF INTEREST STATEMENT

## *American Association of Hip and Knee Surgeons*

(Adopted from the American Academy of Orthopaedic Surgeons disclosure statement)

The following form **must be filled out completely and submitted by each author (example, 6 authors, 6 forms).** **All items require a response. If there is no relevant disclosure for a given item, enter "None."**

**Manuscript Title: Transitions from Culture Negative to Culture Positive Total Knee Arthroplasty  
Periprosthetic Joint Infection After Irrigation and Debridement**

1. Royalties from a company or supplier (The following conflicts were disclosed)  
None
2. Speakers bureau/paid presentations for a company or supplier (The following conflicts were disclosed)  
None
- 3A. Paid employee for a company or supplier (The following conflicts were disclosed)  
None
- 3B. Paid consultant for a company or supplier (The following conflicts were disclosed)  
None
- 3C. Unpaid consultants for a company or supplier (The following conflicts were disclosed)  
None
4. Stock or stock options in a company or supplier (The following conflicts were disclosed)  
None
5. Research support from a company or supplier as a Principal Investigator (The following conflicts were disclosed)  
None
6. Other financial or material support from a company or supplier (The following conflicts were disclosed)  
None
7. Royalties, financial or material support from publishers (The following conflicts were disclosed)  
SLACK Incorporated; Saunders/Mosby-Elsevier Operative Techniques in Orthopaedics
8. Medical/Orthopaedic publications editorial/governing board (The following conflicts were disclosed)  
Journal of Arthroplasty elite reviewer; JAAOS reviewer; CORR reviewer
9. Board member/committee appointments for a society (The following conflicts were disclosed)  
AAOS and AAHKS Abstract Review Committee  
AAOS - Adult Reconstruction Knee Program Committee  
AAHKS Advocacy Committee Member  
AAOS - BOS representative for MSIS 2018-2021  
MSIS Program Committee 2018 Meeting  
MSIS Education Committee Chair 2018-2021

**Each author must sign AND print or type his/her name, date and submit a separate form**

In addition, one BLINDED Conflict of Interest form (no author names used) should be submitted per manuscript with all author disclosures.

BRIAN A. KLATT, MD            4/12/2019  
Author Name (Print or Type)      Author Signature      Date
