# Supplementary material
Source: PubMed Central journal article supplement (PMC6801070)
Supplement: NIHMS1535140-supplement-6.pdf [file NIHMS1535140-supplement-6.pdf]

# INDIVIDUAL CONFLICT OF INTEREST STATEMENT

## *American Association of Hip and Knee Surgeons*

(Adopted from the American Academy of Orthopaedic Surgeons disclosure statement)

The following form **must be filled out completely and submitted by each author (example, 6 authors, 6 forms).**  
**All items require a response. If there is no relevant disclosure for a given item, enter "None."**

**Manuscript Title:** Transitions from Culture Negative to Culture Positive Total Knee Arthroplasty  
Periprosthetic Joint Infection After Irrigation and Debridement

1. Royalties from a company or supplier (The following conflicts were disclosed)  
None

2. Speakers bureau/paid presentations for a company or supplier (The following conflicts were disclosed)  
None

3A. Paid employee for a company or supplier (The following conflicts were disclosed)  
None

3B. Paid consultant for a company or supplier (The following conflicts were disclosed)  
Smith Nephew

3C. Unpaid consultants for a company or supplier (The following conflicts were disclosed)  
None

4. Stock or stock options in a company or supplier (The following conflicts were disclosed)  
None

5. Research support from a company or supplier as a Principal Investigator (The following conflicts were disclosed)  
None

6. Other financial or material support from a company or supplier (The following conflicts were disclosed)  
None

7. Royalties, financial or material support from publishers (The following conflicts were disclosed)  
None

8. Medical/Orthopaedic publications editorial/governing board (The following conflicts were disclosed)  
None

9. Board member/committee appointments for a society (The following conflicts were disclosed)  
AAOS  
ASTM

**Each author must sign AND print or type his/her name, date and submit a separate form**

In addition, one BLINDED Conflict of Interest form (no author names used) should be submitted per manuscript with all author disclosures.

Kenneth Urish



4/22/19

Author Name (Print or Type)

Author Signature

Date
