# Supplementary material
Source: PubMed Central journal article supplement (PMC6801070)

Author Name (Print or Type)

Neel Shah

Author Signature

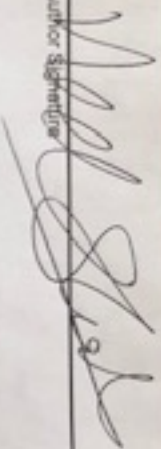

Date

4/11/19

Supplement: NIHMS1535140-supplement-3.pdf [file NIHMS1535140-supplement-3.pdf]
